# Supplementary material
Source: PubMed Central journal article supplement (PMC6054896)
Supplement: NIHMS955871-supplement-3.pdf [file NIHMS955871-supplement-3.pdf]

## Supplementary Figures

**A**

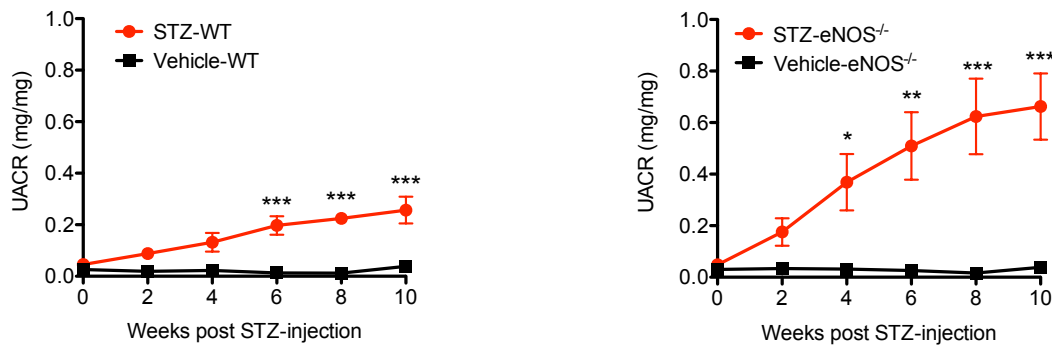

**B**

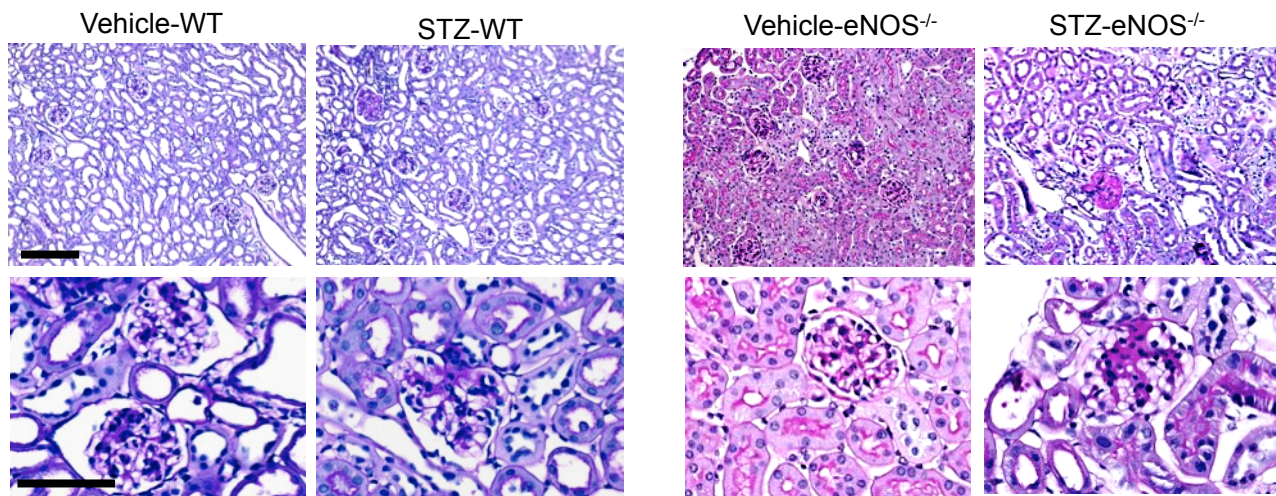

**C**

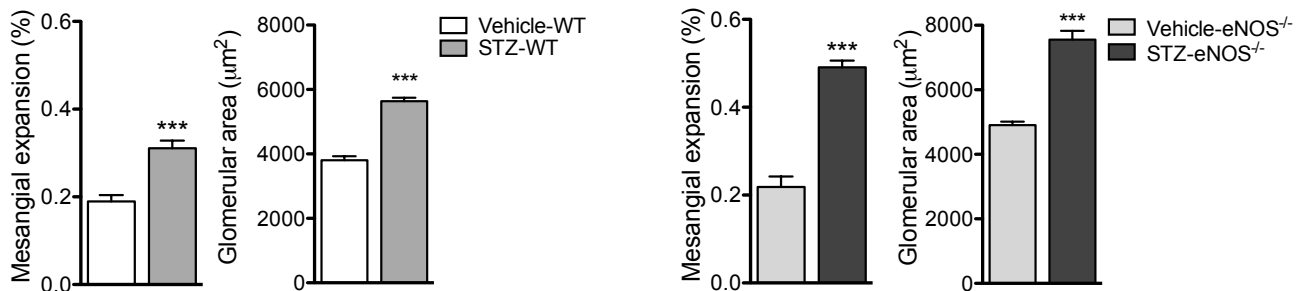

**Supplementary Figure 1: Proteinuria and glomerular injury is worsened in diabetic eNOS<sup>-/-</sup> mice compared to diabetic wildtype mice.** (A) Urinary albumin to creatinine ratio (UCAR) shows the development of proteinuria in diabetic mice. (B) Periodic-acid Schiff-stained kidney sections at 100x (top) and 200x (bottom) magnification. Scale bar: 50µm. (C) Mesangial area and glomerular volume is increased in STZ-diabetic mice. \*P<0.05, \*\*P<0.01, and \*\*\*P<0.001 compared to respective vehicle-control.

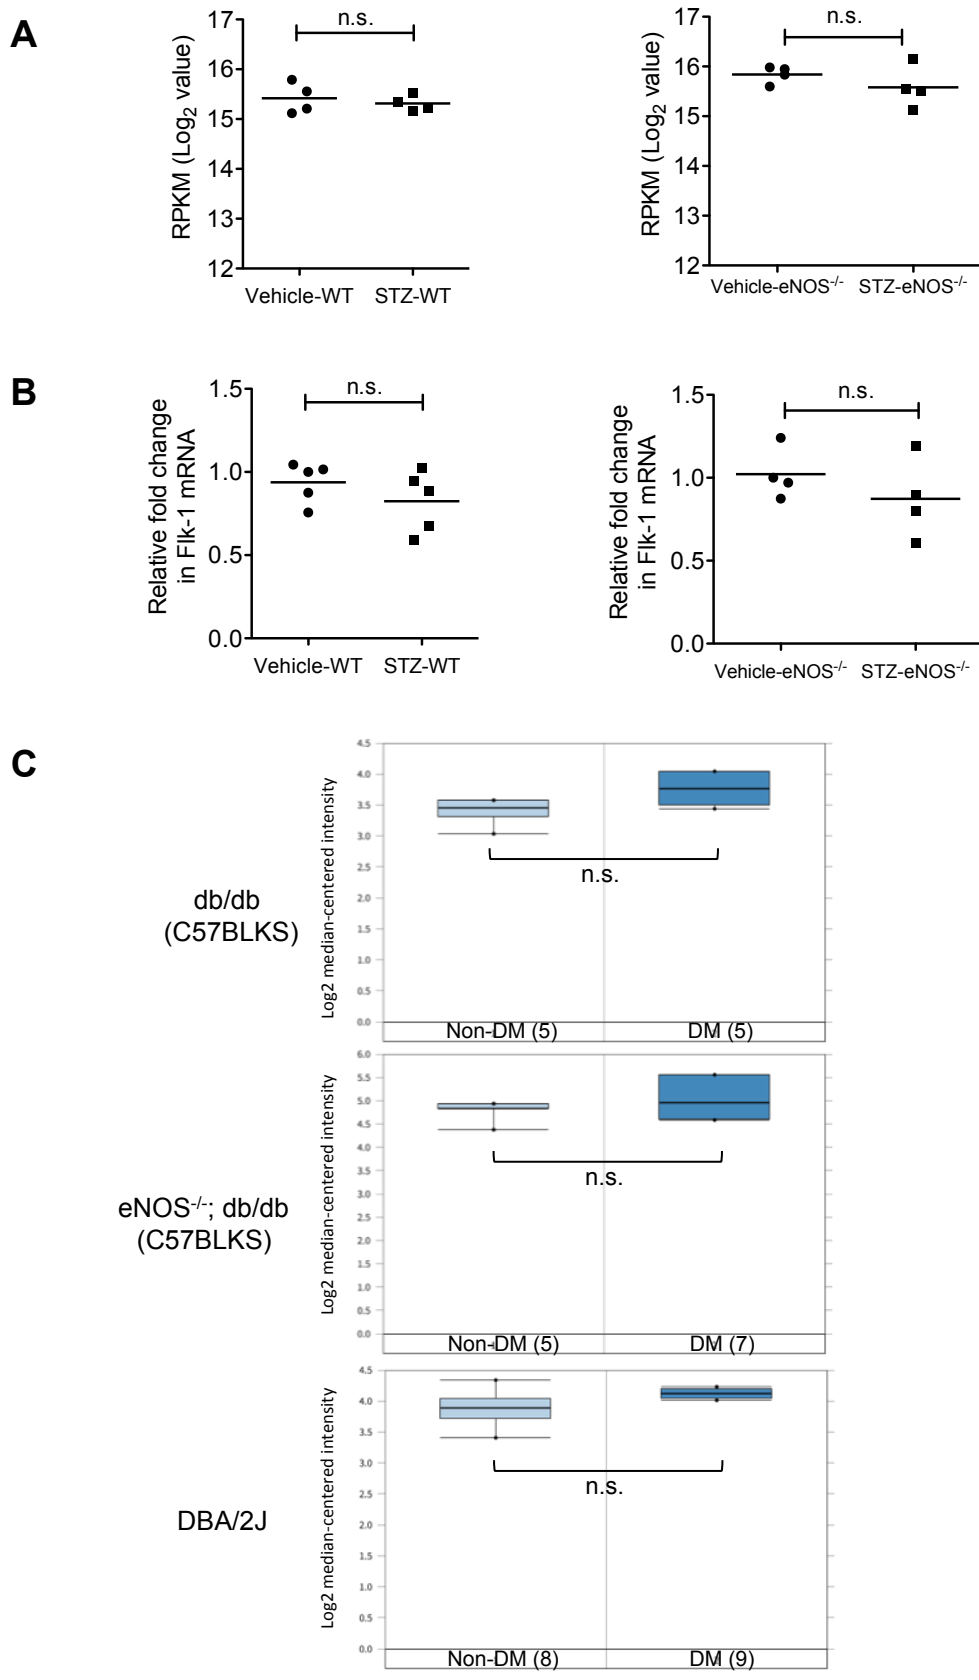

**Supplementary Figure 2: Flk1 (KDR) Expression in glomeruli did not change between normal and diabetic mice.** A) Relative Flk1 expression between vehicle and STZ-injected mice by qPCR. (B) Log<sub>2</sub> value of Flk1 based on mRNA sequencing reads. (C) Expression of Flk1 from 3 datasets of mouse diabetic glomeruli in Nephroseq. RPKM, Reads Per Kilobase of transcript per Million mapped reads; DM, diabetes mellitus; n.s., not significant.

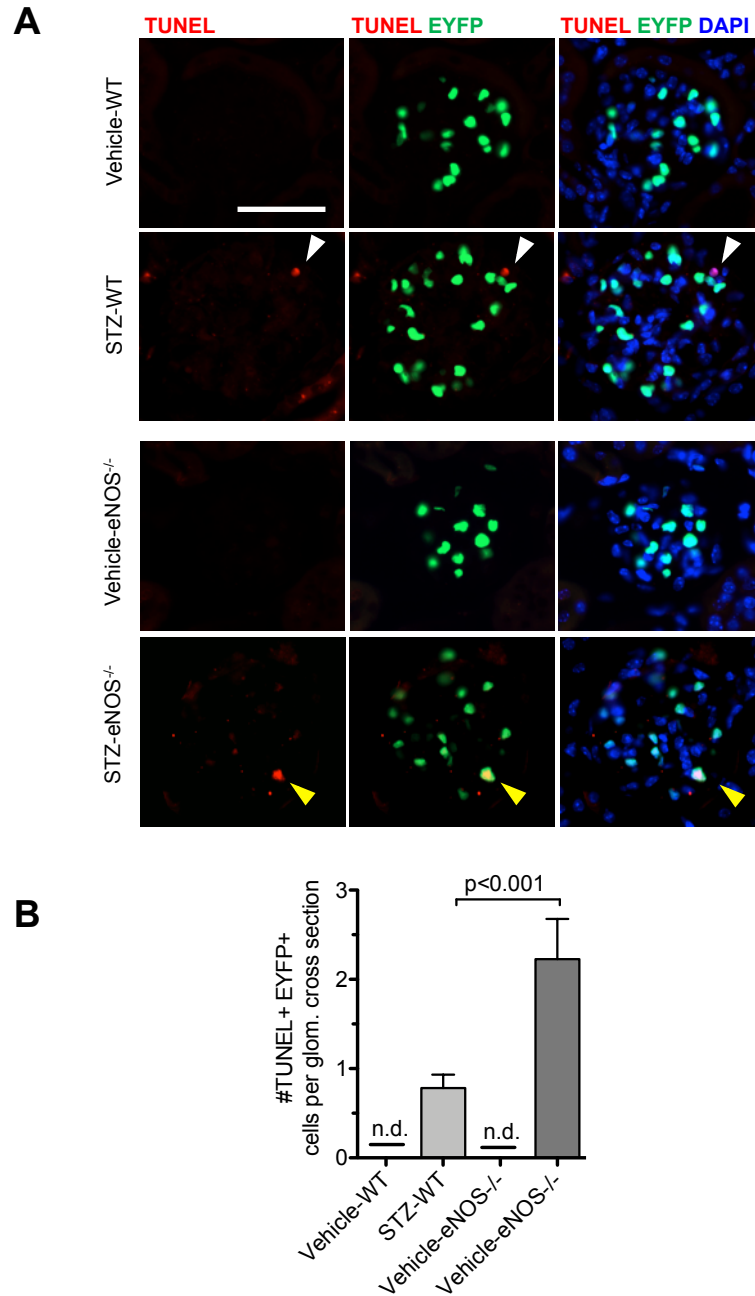

**Supplementary Figure 3: Determination of apoptosis in GECs by TUNEL assay.** (A) Representative fluorescent images of EYFP and TUNEL-positive cells in mouse glomeruli. White arrows shows TUNEL+, EYFP- cells in STZ-WT glomeruli. Yellow arrow show TUNEL+, EYFP+ cell in the STZ-eNOS<sup>-/-</sup> glomeruli. Scale Bar: 50 $\mu$ m. (B) Quantification of # of TUNEL+, EYFP+ cells per glomerular cross section. Results are mean $\pm$ SEM of at least 20 glomeruli evaluated per group (n=3 mice per group). n.d., not detected.

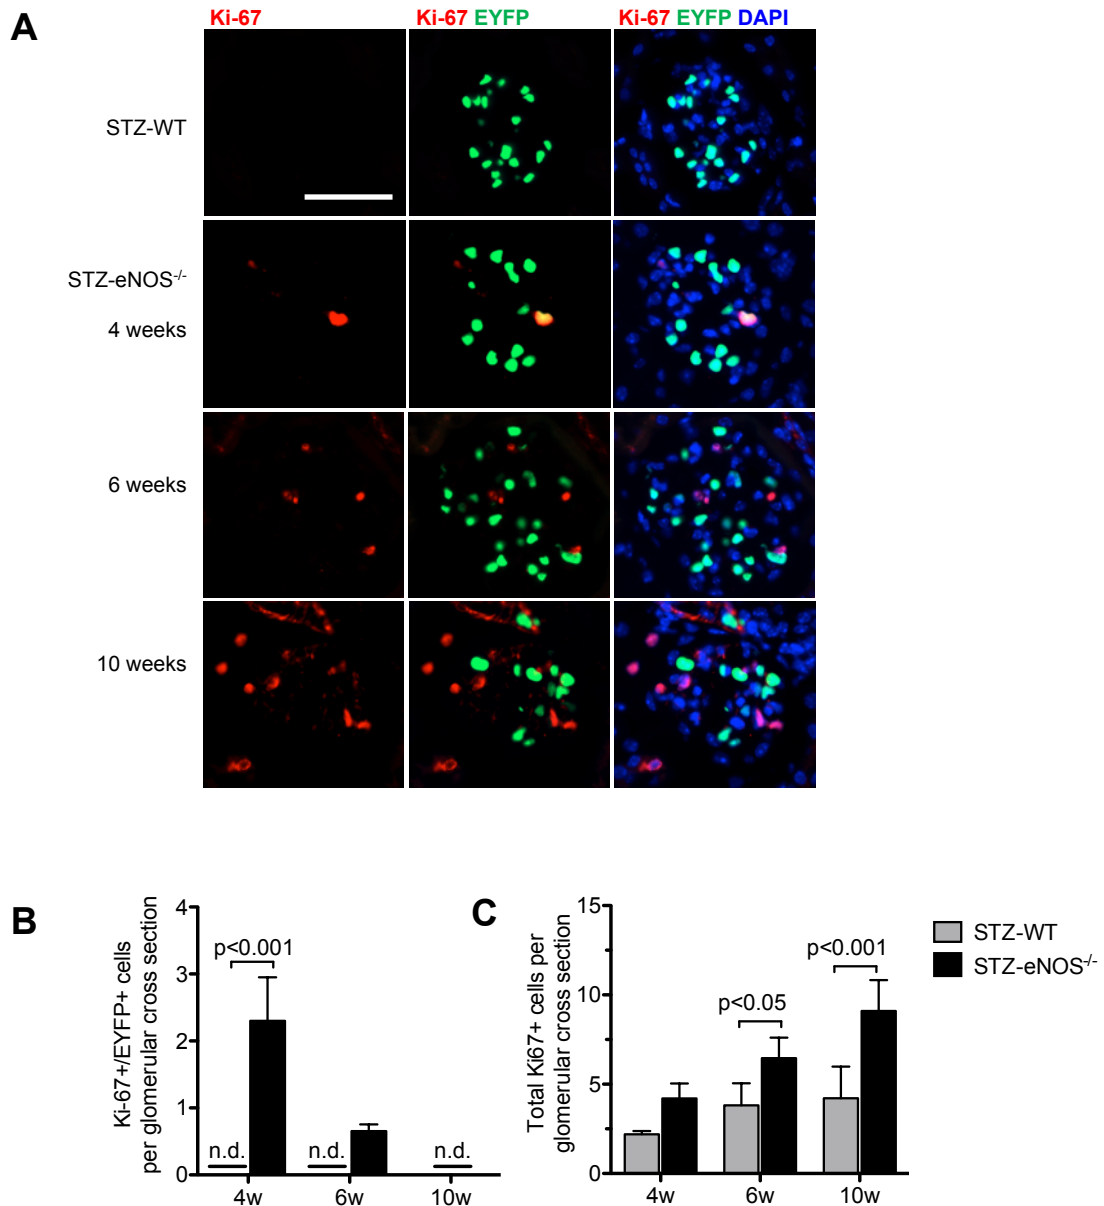

**Supplementary Figure 4: Determination of GEC proliferation by Ki-67 immunofluorescence.** (A) Representative fluorescent images of EYFP+ and Ki-67+ cells in mouse glomeruli. (B) Quantification of # of Ki-67+, EYFP+ cells per glomerular cross section. (C) Quantification of total # of Ki-67+ cells per glomerular cross section. Results are mean±SEM of at least 20 glomeruli evaluated per group (n=3 mice per group). n.d., not detected.

**Lrg1 expression:**

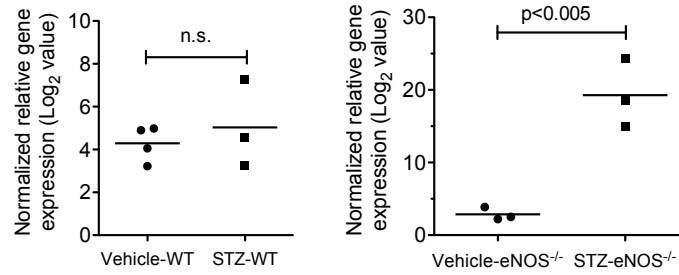

**Gpr56 expression:**

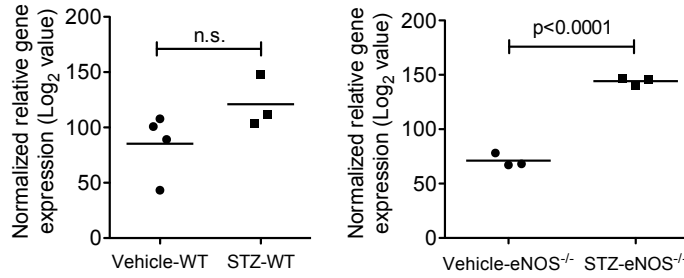

**Zfp57 expression:**

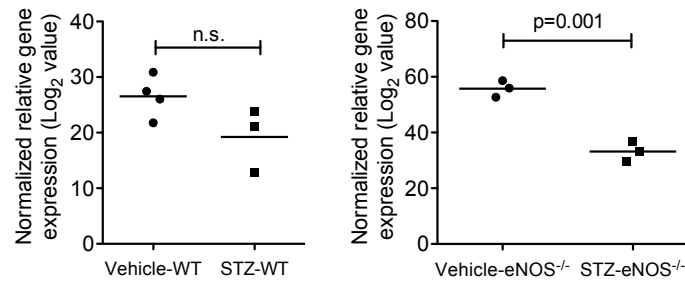

**Supplementary Figure 5: mRNA expression of *Lrg1*, *Gpr56*, and *Zfp57* in GECs.** Expression of *Lrg1*, *Gpr56*, and *Zfp57* levels from mRNA sequencing results are shown as RPKM (Reads Per Kilobase of transcript, per Million mapped reads) as Log<sub>2</sub> values.

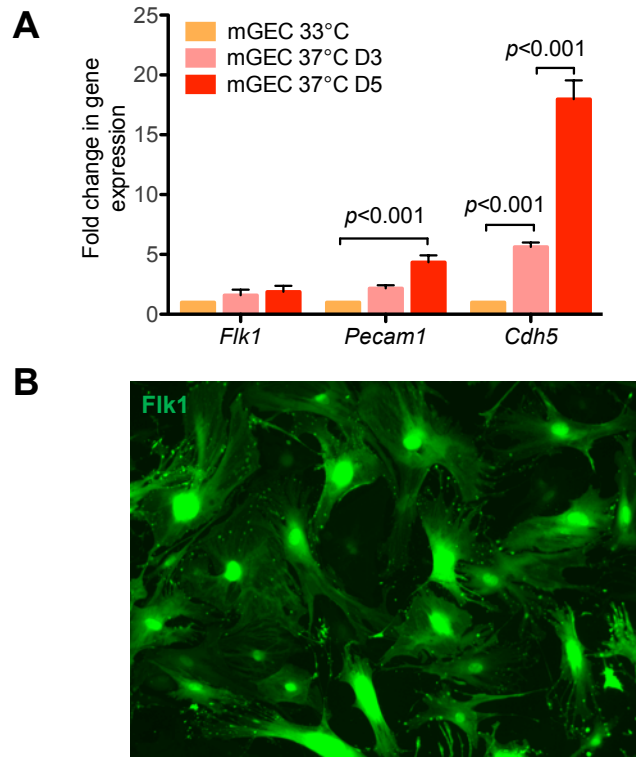

**Supplementary Figure 6: mGEC characterization and overexpression lentivectors.** Immortalized mGECs established from Flk1-H2B-EYFP mice were cultivated at 33°C and further subcloned by either limiting dilution or by single cell sorting into 96-well plates. All in vitro experiments were performed with a single clone (Clone 1) obtained from the outgrowth of a clonal population from single cell sorting into a 96 well plate. (A) Expression of endothelial marker expression by qPCR analysis of mGECs cultivated at 33°C (with IFN- $\gamma$ ), at 37°C for three days (D3), or at 37°C for 5 das (D5) (n=3). (B) Immunofluorescence of Flk-1 (membrane-localized green) is shown in mGEC cultivated for 5 days at 37°C. Robust H2B-EYFP (nucleus-localized green) is still visible in clone1 mGEC.

## Supplementary Tables

**Supplementary Table 1:** Top 10 upregulated GO pathways (Enrichr) in STZ-WT vs. Vehicle-WT GECs

| Term                                                  | p-value  | Genes                                                                                                                                                                 |
|-------------------------------------------------------|----------|-----------------------------------------------------------------------------------------------------------------------------------------------------------------------|
| apoptotic mitochondrial changes (GO:0008637)          | 1.54E-05 | GGCT;MAPK9;JUN;GCLC;ERBB4;BNIP3;PMAIP1;GCLM;ATP7A;BCL2L1;MCL1;IFIT2                                                                                                   |
| mitochondrion organization (GO:0007005)               | 1.66E-04 | MGME1;JUN;HSP90AA1;EPAS1;BNIP3;TFB2M;IFIT2;GGCT;MAPK9;GCLC;COL4A3BP;ERBB4;PMAIP1;MPV17;LPIN1;GCLM;ATP7A;BCL2L1;MCL1                                                   |
| response to unfolded protein (GO:0006986)             | 1.73E-04 | GSK3A;HSP90AA1;FKBP14;GFPT1;DAB2IP;HSPB1;PARP16;YOD1;HSPE1;HSPD1;DNAJA1;HSPH1;CASP12;DDIT3;CREBRF;HSPA1A                                                              |
| apoptotic signaling pathway (GO:0097190)              | 3.83E-04 | CDKN1A;GSK3A;CUL5;ROCK2;RASGRF2;CUL2;XPA;FOXO3;EDA2R;CASP12;APH1B;PMAIP1;JAK2;PHLDA3;MCL1;PDPK1;SORT1;BNIP3;DAPK3;DAB2IP;AEN;CFLAR;DDIT3;DDIT4;JMY;ITGB3BP;BCL2L1     |
| developmental maturation (GO:0021700)                 | 6.58E-04 | FZD5;CBFB;IRX5;EPAS1;NTN4;SYP;FOXO3;KLF2;CLN5;DLG4;DDIT3;GNAQ;S1PR1;PPARG;CFTR;HOXA5                                                                                  |
| pattern specification process (GO:0007389)            | 9.35E-04 | BMPR2;LEF1;GLI1;CXXC4;YY1;EFNB1;SOX17;ERBB4;BASP1;TMEM107;DVL2;HOXA5;BPTF;EDN1;FZD5;TCF15;IRX3;PCGF2;PBX3;FBXL15;PALB2;TTC8;HOXB9;HOXB4;HOXB2;HOXB8;HOXB7;HOXD8;HOXB6 |
| regionalization (GO:0003002)                          | 1.18E-03 | EDN1;BMPR2;TCF15;PCGF2;LEF1;PBX3;FBXL15;GLI1;PALB2;YY1;HOXB9;SOX17;BASP1;TMEM107;HOXB4;HOXB2;HOXB8;HOXB7;HOXA5;HOXB6;BPTF                                             |
| response to virus (GO:0009615)                        | 1.36E-03 | RSAD2;DDX58;BNIP3;MX2;NLRC5;IFI44;HSPB1;IFIT1;IFIT3;IFIT2;IFIH1;OAS2;HYAL1;DDIT4;IRF7;TRIM25;PMAIP1;BCL2L1;TRIM56;GBP3;HSPA1A                                         |
| intracellular receptor signaling pathway (GO:0030522) | 1.67E-03 | DDX58;HNF4G;NR1D2;NR1D1;NR2F6;PIAS1;DCBLD2;IFIH1;DNAJA1;IRAK2;CRY2;KLF9;IRF7;TXNIP;PPARG;JAK2;BCL2L1                                                                  |
| negative regulation of cell growth (GO:0030308)       | 1.37E-03 | CDKN1A;GSK3A;BMPR2;DAB2IP;JADE1;ADIPOR2;DCBLD2;SOX17;BCL6;HYAL1;SERTAD2;CCDC85B;SLIT1;PPARG;HSPA1A                                                                    |

**Supplementary Table 2:** Top 10 upregulated GO pathways (Enrichr) in STZ-eNOS<sup>-/-</sup> vs. Vehicle-eNOS<sup>-/-</sup> GECs

| Term                                                             | p-value  | Genes                                                                                                                                                                                                                   |
|------------------------------------------------------------------|----------|-------------------------------------------------------------------------------------------------------------------------------------------------------------------------------------------------------------------------|
| platelet activation (GO:0030168)                                 | 4.08E-07 | PROS1;ITGB3;SERPINE1;ITGA2B;ARRB1;RASGRP2;GNG2;RAP1A;TBXA2R;LAMP2;CFL1;MAPK1;CD36;RAC1;SRGN;VAV3;ABCC4;ENTPD1;FCER1G;HSPA5;RHOG;MERTK;SOD1;RHOB;F8;PECAM1;MGLL;F2RL3                                                    |
| apoptotic signaling pathway (GO:0097190)                         | 2.85E-06 | CDKN1A;PPP1R13B;YWHAB;CUL2;CIB1;BRCA2;EDA2R;PPM1F;POLB;APH1B;MCF2L;MKNK2;UBC;CD38;PMAIP1;HMOX1;RAC1;PHLDA3;SRGN;VAV3;SORT1;BNIP3;AEN;HIC1;SGPP1;P2RX7;OBSCN;P2RX4;DDIT4;SELK;BAX;FAS;FGFR3;ITGB3BP;BCL2L1               |
| protein folding (GO:0006457)                                     | 4.47E-06 | FKBP10;HSP90AB1;FKBP14;ITGB3;DNAJC24;HSP90B1;BAG5;PSMD5;MLEC;QSOX1;B2M;PDIA3;HSPA8;TOR3A;RIC3;FKBP1;ST13;TUBB4B;PDIA6;PDIA4;FKBP1A;DNAJA4;CANX;FKBP7;PPIH;CALR;FKBP5                                                    |
| angiogenesis (GO:0001525)                                        | 4.95E-06 | ACVRL1;COL18A1;RAMP2;CLIC4;ECM1;NOTCH1;EPAS1;ITGB3;FLT4;SERPINE1;CIB1;CX3CL1;HEY1;SOX18;S1PR1;KDR;HMOX1;EPHB4;HTATIP2;VAV3;JUN;ANXA2;GPR56;RHOB;EFNA1;ID1;MMRN2;ANGPTL4                                                 |
| regulation of angiogenesis (GO:0045765)                          | 1.09E-05 | ACVRL1;RAMP2;ECM1;NOTCH1;SERPINE1;LECT1;HSPB1;CIB1;ADM;CX3CL1;AQP1;RHOB;EFNA1;CXCL10;LRG1;HYAL1;TBXA2R;ID1;MMRN2;KDR;HMOX1;ANGPTL4;HTATIP2                                                                              |
| response to drug (GO:0042493)                                    | 1.39E-05 | COL18A1;CDKN1A;LPL;ATP1A1;PPM1F;ICAM1;AQP1;PNP;CCND1;TBXA2R;PDE4A;CD38;B2M;SNCA;VAV3;MEF2A;ABCC4;JUN;EDN1;SLC12A5;PDE2A;GGH;FOS;DUSP6;FOSL2;SOD1;ACER2;CDK1;TXNIP;PPARG;CALR;UMPS;CFTR;ENG;ABCG2                        |
| negative regulation of protein modification process (GO:0031400) | 1.96E-05 | ERRF1;CDKN1A;YWHAB;GBA;HSPB1;ARRB1;CIB1;PTPRJ;PPM1F;SOCS3;UCHL1;BAG5;PSMD5;CAMK2N1;HYAL2;UBC;INPP5K;XDH;FBXO7;SNCA;JUN;DUSP3;DUSP1;PDE4D;LIMK1;ISG15;SMAD6;DUSP6;SMAD7;PER2;ACER2;FABP4;PPAP2B;DDIT4;CRY1;BAX;TRIB1;ENG |
| regulation of endothelial cell proliferation (GO:0001936)        | 2.11E-05 | ACVRL1;ECM1;JUN;BMPR2;FLT4;ITGB3;LECT1;HMGB2;BMP6;NR4A1;LRG1;KDR;FGFR3;XDH;ENG                                                                                                                                          |
| positive regulation of defense response (GO:0031349)             | 2.16E-05 | SERPINE1;GIMAP5;CX3CL1;COCH;HSP90B1;IKBKB;CTSL;HYAL2;UBC;MAPK1;CD36;CTSB;TGM2;MAP2K3;MEF2A;JUN;FCER1G;DUSP3;IL15;PDE2A;IRAK4;FOS;OSMR;DUSP6;NFKBIA;GPRC5B;FABP4;CDK1;LGMN                                               |
| response to oxygen levels (GO:0070482)                           | 2.37E-05 | CDKN1A;RAMP2;ALAS2;NOTCH1;EPAS1;CUL2;ADM;PLAT;PLOD1;AQP1;ICAM1;HSP90B1;UBC;UCP2;CAPN2;PMAIP1;HMOX1;CD38;EDN1;NOS2;BNIP3;SMAD9;FNDC1;DDIT4;TACC3;FAS;ANGPTL4;ENG                                                         |

**Supplementary Table 3: Top 10 downregulated GO pathways (Enrichr) in STZ-WT vs. Vehicle-WT GECs**

| Term                                                        | p-value  | Genes                                                                                                                                                                                                                                                                         |
|-------------------------------------------------------------|----------|-------------------------------------------------------------------------------------------------------------------------------------------------------------------------------------------------------------------------------------------------------------------------------|
| electron transport chain (GO:0022900)                       | 4.76E-08 | NDUFA8;NDUFA13;NDUFB8;NDUFB7;NDUFA11;NDUFB11;NDUFB4;NDUFA2;NDUFA1;UQCR11;UQCR10;ATP5H;ATP5O;ATP5G1;COX7C;UQCRH;COX6B1;TBXA2R;ATP5E;CYC1;NDUFV3;CYB561                                                                                                                         |
| generation of precursor metabolites and energy (GO:0006091) | 6.49E-07 | GLP1R;NDUFA13;NDUFB8;NDUFB7;NDUFA11;NDUFB11;NDUFB4;AQP7;UQCR11;UQCR10;ATP5H;PYGL;ATP5O;COX7A1;ATP5G1;COX7C;PRKAG3;UQCRH;LDHA;GNG2;TBXA2R;BLOC1S1;ATP5E;CYC1;NDUFV3;NDUFA8;KCNB1;ATPIF1;PGAM2;NDUFA2;NDUFA1;CACNA2D2;GNG11;PHKA2;COX6B1;PPP1R1A;PPP1R3C;PPP1R3D;CYB561;RAPGEF3 |
| extracellular matrix organization (GO:0030198)              | 3.57E-06 | COL15A1;RAMP2;COL16A1;SPARC;ITGB5;LAMA4;ITGA2B;ILK;TNFRSF11B;OLFM2A;NID2;FBLN5;HAPLN1;CAPNS1;CASP3;ABI3BP;ITGB7;JAM2;ANXA2;ITGA3;FN1;LAMB1;GDF5;HSPG2;MMP10;BMP2;ADAM15;LOX;MMP15;COL4A1;COL5A3;COL5A2;MFAP2;COL6A1;VWA1;ITGA6;TGFB1                                          |
| chemotaxis (GO:0006935)                                     | 7.83E-05 | HMGB2;DEFB1;TREM1;PIK3CG;TYMP;EDNRB;FLRT2;FLRT3;CCL5;NTF3;CCRL2;DPYSL3;CMKLR1;MAP2K1;EGR3;CMTM3;HGF;RHOG;VEGFC;IL1B;RAB13;KIT;PLXNB3;ACKR3;ACKR2;MET;EPHA2                                                                                                                    |
| hydrogen ion transmembrane transport (GO:1902600)           | 5.42E-05 | CYB5A;UQCR11;ATP5G3;UQCR10;ATP5H;ATP5G2;ATP5O;COX7A1;ATP5G1;COX7C;UQCRH;COX6B1;SLC9A5;ATP5E;ATP6V1E1;ATP6V1F                                                                                                                                                                  |
| protein localization to membrane (GO:0072657)               | 1.63E-04 | NDUFA13;RAMP2;RAMP3;RPL32;RPL11;RPL36A;NKD2;RPL7;RPS4X;RPS15;RPS14;RPS18;SEC61G;ITGB7;RPL39;RAB8A;PEX16;ANXA2;SSR2;TIMM22;HPS6;ANK3;RPS27;SPCS1;DOK7;MYADM;VAMP5                                                                                                              |
| angiogenesis (GO:0001525)                                   | 2.19E-04 | EGFL7;COL15A1;RAMP2;ANXA2;NOS3;ATPIF1;FN1;VEGFC;VASH1;HSPG2;SAT1;PLXDC1;PIK3R6;PIK3CG;TYMP;DLL4;EFNA1;TMEM100;ADAM15;ACKR3;TGFB1;CD34;RAPGEF3;EPHA2                                                                                                                           |
| cell-substrate adhesion (GO:0031589)                        | 2.86E-04 | ITGB5;ITGA3;ITGA2B;FN1;ILK;LAMB1;ADAMTS12;NID2;FBLN5;EFNA1;TIAM1;ADAM15;COL5A3;MICALL2;ITGA6;ITGB7;CD34                                                                                                                                                                       |
| cellular protein complex disassembly (GO:0043624)           | 2.73E-04 | RPL32;RPL11;RPL36A;MICAL2;RPL7;RPS4X;RPS15;RPS14;RPS27;KIF18B;DNAJC6;RPS18;STMN1;KIF2C;RPL39                                                                                                                                                                                  |
| extracellular matrix organization (GO:0030198)              | 3.37E-04 | PEX16;RPL32;ANXA2;SSR2;RPL11;RPL36A;ANK3;NKD2;RPL7;RPS4X;RPS15;RPS14;RPS27;SPCS1;RPS18;SEC61G;MYADM;RPL39                                                                                                                                                                     |



**Supplementary Table 4:** Top 10 downregulated GO pathways (Enrichr) in STZ-eNOS<sup>-/-</sup> vs. Vehicle-eNOS<sup>-/-</sup> GECs

| Term                                                    | p-value  | Genes                                                                                                                                                                                                                                                                                                                                                                                                                                                                                                                                                                                                                   |
|---------------------------------------------------------|----------|-------------------------------------------------------------------------------------------------------------------------------------------------------------------------------------------------------------------------------------------------------------------------------------------------------------------------------------------------------------------------------------------------------------------------------------------------------------------------------------------------------------------------------------------------------------------------------------------------------------------------|
| ncRNA metabolic process (GO:0034660)                    | 1.60E-11 | ZCCHC11;VARS;TSEN15;WDR4;MTO1;RRP8;TSEN54;RRP9;FBL;NARS2;DUS4L;UTP14A;UTP15;PRMT5;NCBP1;TYW5;DIMIT1;DIS3;NSUN5;TYW3;PUS1;ELAC2;NSUN2;DDX56;ELAC1;TRPT1;IMP4;TFB2M;UTP11L;QTRT1;QRS1;FSTSJ1;UTP18;GTPBP3;WDR77;FSTSJ3;QTRT1;CTU2;DALRD3;SARS2;CIRH1A;PPA2;RRNA D1;DKC1;PAPD5;TUT1;GEMIN5;EEF1E1;DUS3L;TRUB1;NOLC1;LAGE3;RBFANOL6;EXOSC7;EXOSC5;EMG1;PDCD11;WBSR22;UTP20;SMN1;RPP14;PUSL1;TRDMT1;EXOSC1;DCAF13;FDXACB1;SMAD2;NOP56;NOP14;UTP6;NOP58;SMA D3;GATC;TRMT1;RRP1B;PA2G4;PUS7L;HARS2;TARBP2;WARS2;BOP1;LAS1L;AGO2;TRMT13;INTS6;FARSA;NOP10                                                                       |
| rRNA processing (GO:0006364)                            | 2.66E-07 | NOLC1;RBFANOL6;RRP8;RRP9;NOL6;EXOSC7;FBL;EXOSC5;EMG1;PDCD11;WBSR22;UTP20;UTP14A;EXOSC1;DCAF13;NOP56;UTP15;NOP14;UTP6;NOP58;DIMIT1;DIS3;NSUN5;DDX56;IMP4;TFB2M;PA2G4;UTP11L;RRP1B;UTP18;FSTSJ3;BOP1;CIRH1A;LAS1L;RRNAD1;DKC1;PAPD5;NOP10                                                                                                                                                                                                                                                                                                                                                                                 |
| chromatin modification (GO:0016568)                     | 8.94E-07 | KDM5A;SUV420H2;CRTC2;KDM5C;SETD8;HDAC10;LDB1;PHF1;SETD7;HDAC11;JADE1;DPY30;ARID4A;PRDM2;JADE3;CHD4;CHD3;BMI1;RRP8;MECP2;ELK4;ING5;FBL;ING2;ING3;RPS6KA5;EPC1;HMG20A;EPC2;JAK2;JARID2;HMG3;CSRP2BP;KDM6A;TSPYL2;NCOA1;PRMT6;PRMT5;SMARCC1;KDM2A;PRMT7;USP49;KDM2B;PRMT2;RING1;DTX3L;PRMT3;DNMT3A;TET2;MSL3;TET1;PRKCA;CHD1L;ARID1B;TERF2;DDB2;JMJD6;DNAJC2;KAT2B;WDR82;KAT6B;CLOCK;KDM7A;HDAC5;ENY2;PRKAA2;L3MBTL2;MEAF6;LEF1;DOT1L;HDAC6;TAF5L;BAG6;HLC S;LEO1;SMYD2;WBSR22;PCGF1;BRD9;APBB1;DMAP1;CBX2;SS18L;PCGF2;ELP4;TDRD3;HOPX;ASXL1;TADA2A;KANSL2;CDK2;TADA1;TCF3;OGT                                             |
| RNA modification (GO:0009451)                           | 4.25E-06 | TRUB1;RNMT;WDR4;TRMT2A;MTO1;EMG1;PUSL1;DUS4L;TRDMT1;WTAP;TYW5;DIMIT1;PUS1;NSUN2;METTL3;TRMT1;TFB2M;QTRT1;PUS7L;FSTSJ1;FSTSJ3;GTPBP3;QTRT1;RPUSD4;CTU2;RRNAD1;DKC1;DUS3L;NOP10                                                                                                                                                                                                                                                                                                                                                                                                                                           |
| tRNA metabolic process (GO:0006399)                     | 6.22E-06 | TRUB1;VARS;TSEN15;WDR4;MTO1;LAGE3;TSEN54;FBL;NARS2;PUSL1;RPP14;DUS4L;TRDMT1;FDXACB1;TYW5;PUS1;TYW3;ELAC2;NSUN2;ELAC1;GATC;TRPT1;TRMT1;QTRT1;PUS7L;QRS1;FSTSJ1;HARS2;WARS2;GTPBP3;QTRT1;CTU2;DALRD3;SARS2;PPA2;TRMT13;EEF1E1;FARSA;DUS3L                                                                                                                                                                                                                                                                                                                                                                                 |
| methylation (GO:0032259)                                | 2.45E-05 | N6AMT1;SUV420H2;SETD8;SETD7;WDR4;ARID4A;DPY30;PRDM2;RRP8;GCSH;MECP2;TRMT112;FBL;COMTD1;METTL13;METTL16;KDM6A;PRMT6;HEMK1;PRMT5;PRMT7;PRMT2;DIMIT1;NSUN5;TYW3;NSUN2;PRMT3;DNMT3A;METTL3;TET2;NSUN6;TFB2M;FSTSJ1;FSTSJ3;METTL23;RRNAD1;WDR82;PICK1;GART;RNMT;SMYD5;DOT1L;TRMT2A;PRDM10;EMG1;ZFP57;SMYD2;WBSR22;DPH5;DMAP1;TRDMT1;ATF7IP;WTAP;TRMT1;TRMT13;ZCCHC4;OGT                                                                                                                                                                                                                                                      |
| positive regulation of GTPase activity (GO:0043547)     | 4.77E-05 | BCAR3;USP6NL;CD40;DOCK3;FAM13B;DENND1A;DOCK7;ARHGEF10L;ARHGAP6;RCBTB2;ARHGAP4;ARHGAP44;DOCK10;RGS4;DOCK11;RGS5;SYDE1;ARHGAP42;SYNGAP1;RASGEF1A;AKT2;ARHGDI;EVI5L;ARHGEF40;GARNL3;PSD;PLEKHG3;PLEKHG1;PLEKHG2;ARHGEF15;DIS3;ARHGEF17;DENND2A;AXIN1;ARAP1;ARFGAP1;VAV2;BCR;ARHGAP10;TIAM1;TBC1D1;ARHGEF9;RABEP1;RASA3;SPATA13;RASA2;TBC1D25;PTPLAD1;DENND6B;DOCK2;SOS1;RAPGEF6;ARHGEF5;LLGL1;ARHGEF6;TBC1D19;ARHGEF25;ARHGAP18;RASAL3;KALRN;FGD1;FGD6;CHN2;NTF3;ERBB2;NCKAP1L;EPS8L2;WNT4;FARP1;STARD13;EIF2B3;DENND4B;DENND4A;RAB3IP;MYO9A;SGSM1;ARHGAP33;TBCK;ARHGAP32;SNX18;ARHGAP30;SGSM2;RGL3;PLXNB1;AGRN;SMAP2;RGL1 |
| regulation of cell adhesion (GO:0030155)                | 7.67E-05 | DDR1;PTPRR;ECM2;LDB1;CITED2;PDE3B;ILK;PTPN23;ARHGAP6;PPP1CB;FLCN;C1QBP;ARHGDI;PIEZO1;ITGAV;JAK2;CYTIP;HOXA7;PRKG1;PPP1R12A;SYK;PRKCD;PRKCA;ANK3;DUSP26;GTPBP4;SFRP2;MYADM;COL8A1;PRKD2;UTRN;KANK1;ROCK2;LAMA4;LEF1;ALOX12;PRKX;PIK3R1;FBLN2;THBS1;ATXN3;NUAK1;BAG4;MAPK7;ERBB2;NCKAP1L;JAM2;WNT4;TGFB2;SMAD3;DMTN;ANGPT2;MYO10;FZD7;VEGFC;LAMB1;BRAF;ASS1;DAB2;BMP2;CXCL12;PTPRC;SNAI2;PLXNB1;SERPINI1                                                                                                                                                                                                                  |
| regulation of Ras GTPase activity (GO:0032318)          | 7.31E-05 | USP6NL;CD40;DENND1A;DOCK7;ARHGEF10L;ARHGAP6;RCBTB2;ARHGAP4;DOCK10;DOCK11;SYDE1;SYNGAP1;RASGEF1A;AKT2;EVI5L;ARHGEF40;PLEKHG3;EPA4;PLEKHG1;PLEKHG2;ARHGEF15;ARHGEF17;DENND2A;ARAP1;ARFGAP1;VAV2;BCR;ARHGAP10;TIAM1;TBC1D1;ARHGEF9;RASA3;SPATA13;RASA2;TBC1D25;DENND6B;SOS1;DOCK2;ARHGEF5;LLGL1;ARHGEF6;TBC1D19;ARHGEF25;RASAL3;KALRN;FGD1;FGD6;NTF3;ERBB2;NCKAP1L;EPS8L2;RCTOR;WNT4;FARP1;NTRK2;DENND4B;DENND4A;RAB3IP;SGSM1;ARHGAP33;TBCK;SGSM2;RGL3;PLXNB1;AGRN;RGL1;SMAP2                                                                                                                                              |
| positive regulation of Rho GTPase activity (GO:0032321) | 4.08E-05 | CD40;ARHGEF25;DOCK7;ARHGEF10L;ARHGAP6;KALRN;FGD1;ARHGAP4;DOCK10;DOCK11;SYDE1;FGD6;ERBB2;EPS8L2;NCKAP1L;ARHGEF40;WNT4;PLEKHG3;FARP1;PLEKHG1;PLEKHG2;ARHGEF15;ARHGEF17;ARAP1;VAV2;BCR;ARHGAP33;ARHGAP10;TIAM1;ARHGEF9;SPATA13;PLXNB1;DOCK2;SOS1;AGRN;ARHGEF5;ARHGEF6                                                                                                                                                                                                                                                                                                                                                      |

**Supplementary Table 5:** Top 10 upregulated GO pathways (Enrichr) in STZ-eNOS<sup>-/-</sup> vs. Vehicle-eNOS<sup>-/-</sup> GECs

| Term                                                                              | p-value  | Genes                                                                                                                                                                    |
|-----------------------------------------------------------------------------------|----------|--------------------------------------------------------------------------------------------------------------------------------------------------------------------------|
| positive regulation of inflammatory response (GO:0050729)                         | 2.26E-08 | NLRP12;SEMA7A;SERPINE1;TNFAIP3;LPL;S100A9;SELE;PLA2G7;S100A8;CX3CL1;TLR2;BIRC3                                                                                           |
| neutrophil degranulation (GO:0043312)                                             | 3.63E-08 | ITGAM;ATP8A1;GMFG;PYGL;CNN2;ADGRG3;TRPM2;HK3;ALDH3B1;CXCR2;QS OX1;ACE;FCER1G;NFAM1;RHOG;PLAUR;AMPD3;TUBB4B;MMP8;MMP9;LRG1;CLEC4D;FABP5;LCN2;ADAM8;S100A9;S100A8;TLR2;LTF |
| inflammatory response (GO:0006954)                                                | 4.11E-05 | NRROS;NFAM1;F2R;CXCR4;FOS;SELE;CXCL2;ADORA2A;IL1B;CXCR2;NLRP3;ADAM8;S100A9;S100A8                                                                                        |
| negative regulation of Notch signaling pathway (GO:0045746)                       | 4.69E-05 | DLL4;GALNT11;NLRP12;SRMS;IGFBP3;CHAC1                                                                                                                                    |
| negative regulation of lipopolysaccharide-mediated signaling pathway (GO:0031665) | 5.39E-05 | NLRP12;SRMS;IGFBP3;TRIB1;LTF                                                                                                                                             |
| negative regulation of insulin receptor signaling pathway (GO:0046627)            | 1.00E-04 | SOCS3;NLRP12;SRMS;CISH;IGFBP3;IL1B                                                                                                                                       |
| dendritic cell chemotaxis (GO:0002407)                                            | 1.76E-04 | CCR1;TRPM2;CXCR2;CXCR4                                                                                                                                                   |
| negative regulation of CD40 signaling pathway (GO:2000349)                        | 2.27E-04 | NLRP12;SRMS;IGFBP3;TNFAIP3                                                                                                                                               |
| positive regulation of actin cytoskeleton reorganization (GO:2000251)             | 2.41E-04 | TRPM2;NTF3;HCLS1;BAIAP2;SORBS3                                                                                                                                           |
| negative regulation of cell adhesion mediated by integrin (GO:0033629)            | 2.45E-04 | EFNA1;ACER2;SERPINE1;TGFB1;EPHA2;RND1                                                                                                                                    |

**Supplementary Table 6:** Top 10 downregulated GO pathways (Enrichr) in STZ-eNOS<sup>-/-</sup> vs. Vehicle-eNOS<sup>-/-</sup> GEC

| Term                                                                                                                 | p-value  | Genes                                                                                                                                                                                                                |
|----------------------------------------------------------------------------------------------------------------------|----------|----------------------------------------------------------------------------------------------------------------------------------------------------------------------------------------------------------------------|
| synapse assembly (GO:0007416)                                                                                        | 3.95E-08 | CHRM3;PCDHGB6;PCDHGB5;FUT10;PCDHGB2;EFNB3;ST8SIA4;PCDHGA8;GDF11;PCDHGA7;PCDHGA6;PCDHGA5;FZD5;PCDHGA4;PCDHGA3;PCDHGC5;PCDHGA2;PCDHGC4;PCDHGA1;PCDHGA9;PCDHGA10;DNM3;PCDHGA11;OLFM1;PCDHGA12;ZEB2;MPPED2;PCDHGB1;FGF11 |
| response to unfolded protein (GO:0006986)                                                                            | 1.80E-07 | DNAJA1;DNAJB2;HSPA8;DNAJB1;HSP90AA1;HSPH1;HSPA4L;HSPA1A;HSPD1                                                                                                                                                        |
| ATP generation from ADP (GO:0006757)                                                                                 | 1.36E-04 | HSPA8;AK1;MYH8;CMPK2;HSPA1B;HSPA1A                                                                                                                                                                                   |
| renal system development (GO:0072001)                                                                                | 1.45E-04 | PAX8;SOX17;IFT140;ITGB4;PTCH1                                                                                                                                                                                        |
| negative regulation of protein ubiquitination (GO:0031397)                                                           | 4.42E-04 | DNAJA1;DNAJB2;HSP90AA1;CHORDC1;HSPA1B;SOX4;HSPA1A                                                                                                                                                                    |
| membrane fusion (GO:0061025)                                                                                         | 5.42E-04 | DNM3;NAPB;UBXN2A;MX2;CHORDC1;DNM1                                                                                                                                                                                    |
| regulation of cellular response to heat (GO:1900034)                                                                 | 8.20E-04 | HSPA8;DNAJB1;HSP90AA1;HSPH1;PTGES3;CHORDC1;CRYAB;HSPA1B;HSPA1A                                                                                                                                                       |
| positive regulation of cell-cell adhesion (GO:0022409)                                                               | 9.77E-04 | EPHA7;CXCL12;CITED2;LEF1;CHRD;CCR7;DUSP26                                                                                                                                                                            |
| kidney development (GO:0001822)                                                                                      | 1.24E-03 | TGFB2;PAX8;SOX17;IFT140;ITGB4;PTCH1;PCSK5                                                                                                                                                                            |
| canonical Wnt signaling pathway involved in positive regulation of epithelial to mesenchymal transition (GO:0044334) | 1.28E-03 | OLFM1;TGFB2;SFRP1;FZD3;FZD5;EGF;LEF1;SOX4;BCL9L                                                                                                                                                                      |

**Supplementary Tables 7-10: Analysis of DEGs[STZ-eNOS<sup>-/-</sup> vs. Vehicle-eNOS<sup>-/-</sup>] vs. DEGs[STZ-WT vs. vehicle-WT]**

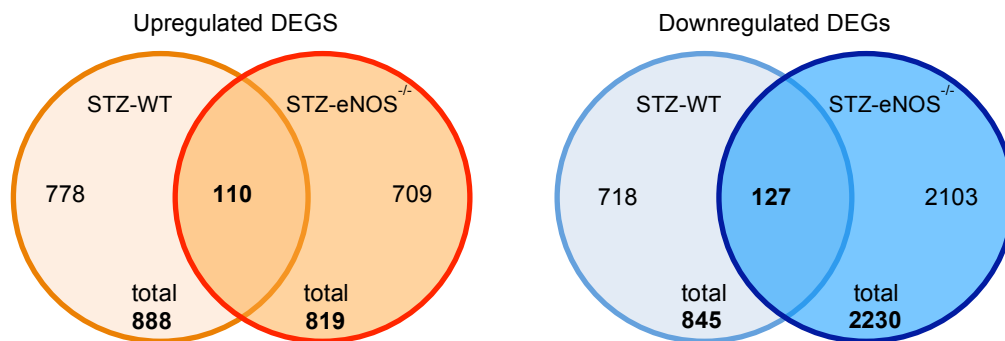

**Supplementary Table 7:** Top 10 GO pathways of *shared* upregulated DEGs between [STZ-eNOS<sup>-/-</sup> vs. Vehicle-eNOS<sup>-/-</sup>] and [STZ-WT vs. vehicle-WT] (110 genes)

| Term                                                                     | p-value  | Genes                                                                      |
|--------------------------------------------------------------------------|----------|----------------------------------------------------------------------------|
| intrinsic apoptotic signaling pathway by p53 class mediator (GO:0072332) | 9.12E-07 | CDKN1A;DDIT4;PMAIP1;AEN;EDA2R;PHLDA3                                       |
| apoptotic signaling pathway (GO:0097190)                                 | 1.02E-06 | CDKN1A;APH1B;SORT1;BNIP3;DDIT4;CUL2;PMAIP1;AEN;ITGB3BP;EDA2R;BCL2L1;PHLDA3 |
| regulation of cell growth (GO:0001558)                                   | 3.50E-05 | CDKN1A;BMPR2;BCL6;HYAL1;FAM107A;ISLR2;PPARG;ADIPOR2;PLXNA4;CXCL16          |
| positive regulation of cellular component movement (GO:0051272)          | 1.03E-04 | EDN1;BMPR2;BCL6;HYAL1;SERPINE1;S1PR1;HSPB1;MAPK1;CXCL16                    |
| white fat cell differentiation (GO:0050872)                              | 1.18E-04 | PER2;FABP4;PPARG                                                           |
| regulation of chemotaxis (GO:0050920)                                    | 1.22E-04 | EDN1;BMPR2;SERPINE1;S1PR1;HSPB1;PLXNA4                                     |
| regulation of endothelial cell proliferation (GO:0001936)                | 2.63E-04 | ECM1;JUN;BMPR2;LECT1;XDH                                                   |
| positive regulation of response to external stimulus (GO:0032103)        | 2.86E-04 | EDN1;BMPR2;FABP4;SERPINE1;S1PR1;HSPB1;OSMR                                 |
| negative regulation of intracellular signal transduction (GO:1902532)    | 3.14E-04 | TLE1;PIK3IP1;BCL6;DDIT4;HSPB1;RASAL2;XDH;BCL2L1;PHLDA3                     |
| release of cytochrome c from mitochondria (GO:0001836)                   | 6.53E-04 | JUN;PMAIP1;BCL2L1                                                          |

**Supplementary Table 8:** Top 10 GO pathways of *shared* downregulated DEGs between [STZ-eNOS<sup>-/-</sup> vs. Vehicle-eNOS<sup>-/-</sup>] and [STZ-WT vs. vehicle-WT] (127 genes)

| Term                                                    | p-value  | Genes                                                        |
|---------------------------------------------------------|----------|--------------------------------------------------------------|
| positive regulation of cell migration (GO:0030335)      | 7.46E-05 | BMP2;SEMA6A;NTF3;MYADM;ILK;VEGFC;LAMB1;MET;HBEGF             |
| positive regulation of cell development (GO:0010720)    | 9.13E-05 | CAMK2B;TIAM1;BMP2;SEMA6A;VDR;NTF3;MYADM;ILK;VEGFC;RARB       |
| extracellular matrix organization (GO:0030198)          | 9.33E-05 | BMP2;COL15A1;COL16A1;MMP15;CASP3;LAMA4;COL5A2;ILK;LAMB1;JAM2 |
| muscle cell differentiation (GO:0042692)                | 1.25E-04 | BMP2;EDNRB;IGFBP5;NTF3;RARB;MET                              |
| positive regulation of MAP kinase activity (GO:0043406) | 2.72E-04 | CD40;BMP2;DBNL;NTF3;ILK;MET;PIK3R6                           |
| cell morphogenesis (GO:0000902)                         | 3.34E-04 | FAM101B;BMP2;VDR;MICALL2;ILK;LAMB1;MET                       |
| positive regulation of neurogenesis (GO:0050769)        | 4.42E-04 | CAMK2B;TIAM1;BMP2;SEMA6A;NTF3;ILK;VEGFC;RARB                 |
| neuron projection guidance (GO:0097485)                 | 5.29E-04 | SEMA6A;FLRT2;FLRT3;COL5A2;NTF3;EVL;LAMB1;ANK3;MET            |
| morphogenesis of an epithelium (GO:0002009)             | 5.90E-04 | ADAMTS16;BMP2;HHEX;VDR;ILK;VEGFC;MET;MTSS1                   |
| filopodium assembly (GO:0046847)                        | 6.05E-04 | SPATA13;MTSS1L;MTSS1                                         |

**Supplementary Table 9:** Top 10 GO pathways of upregulated DEGs *only* in [STZ-eNOS<sup>-/-</sup> vs. Vehicle-eNOS<sup>-/-</sup>] and not in [STZ-WT vs. vehicle-WT] (709 genes)

| Term                                                        | p-value  | Genes                                                                                                                                                                              |
|-------------------------------------------------------------|----------|------------------------------------------------------------------------------------------------------------------------------------------------------------------------------------|
| platelet activation (GO:0030168)                            | 2.38E-06 | SRGN;VAV3;ABCC4;ENTPD1;FCER1G;HSPA5;ITGB3;ITGA2B;RHOG;ARRB1;RASGRP2;MERTK;SOD1;RHOB;GNG2;RAP1A;TBXA2R;LAMP2;CFL1;PECAM1;CD36;RAC1;MGLL;F2RL3                                       |
| cell morphogenesis involved in differentiation (GO:0000904) | 2.51E-05 | MEF2A;COL18A1;CLIC4;NOTCH1;ARHGEF26;FZD4;ITGB3;NOTCH4;PXN;MERTK;EFNA1;RELN;HEY1;ID1;HES1;RAC1;FERMT3;VAMP3                                                                         |
| angiogenesis (GO:0001525)                                   | 5.65E-05 | ACVRL1;VAV3;COL18A1;RAMP2;CLIC4;NOTCH1;ANXA2;GPR56;ITGB3;FLT4;CIB1;CX3CL1;RHOB;EFNA1;HEY1;SOX18;ID1;MMRN2;KDR;HMOX1;ANGPTL4;EPHB4;HTATIP2                                          |
| protein folding (GO:0006457)                                | 6.12E-05 | PDIA3;FKBP10;HSPA8;TOR3A;HSP90AB1;FKBPL;ST13;ITGB3;TUBB4B;PDIA6;HSP90B1;PDIA4;FKBP1A;BAG5;PSMD5;CANX;FKBP7;MLEC;QSOX1;PPIH;CALR;B2M                                                |
| regulation of blood pressure (GO:0008217)                   | 8.47E-05 | ACVRL1;KCNK6;RAMP2;ACE;NOS2;ECE1;ATP1A1;ADH5;MANF;SOD1;P2RX4;TBXA2R;ID2;HMOX1;SGK1;ENG                                                                                             |
| establishment of endothelial barrier (GO:0061028)           | 9.20E-05 | RAP1A;SOX18;PDE4D;PDE2A;MSN;ICAM1                                                                                                                                                  |
| vasculogenesis (GO:0001570)                                 | 9.63E-05 | GJC1;RAMP2;NOTCH1;HEY1;SOX18;FZD4;ZMIZ1;KDR;ADM;PTPRJ;ENG                                                                                                                          |
| regulation of cytoskeleton organization (GO:0051493)        | 9.81E-05 | CLIC4;ARPC1B;CIB1;SKA3;PPM1F;ICAM1;CAPZB;CFL1;CAPN2;INPP5K;SH3BGRL3;RAC1;SNCA;MEF2A;PLK4;ARHGEF10;LIMK1;SHROOM2;BAIAP2;SORBS3;BST2;P2RX7;TPX2;CLIP1;ARPC3;DLC1;CDC42EP2;MAPT;MYO1F |
| regulation of vasculature development (GO:1901342)          | 1.02E-04 | ACVRL1;RAMP2;NOTCH1;CIB1;ADM;CX3CL1;AQP1;RHOB;EFNA1;CXCL10;RAP1A;LRG1;HEY1;TBXA2R;ID1;MMRN2;KDR;HMOX1;ANGPTL4;HTATIP2                                                              |
| toll-like receptor signaling pathway (GO:0002224)           | 1.12E-04 | MEF2A;MAP2K3;DUSP3;IRAK4;FOS;DUSP6;HSP90B1;IKBK;NFKBIA;CTSL;UBC;CDK1;CD36;CTSB;LGMN                                                                                                |

**Supplementary Table 10:** Top 10 GO pathways of downregulated DEGs *only* in [STZ-eNOS<sup>-/-</sup> vs. Vehicle-eNOS<sup>-/-</sup>] and not in [STZ-WT vs. vehicle-WT] (2103 genes)

| Term                                                    | p-value  | Genes                                                                                                                                                                                                                                                                                                                                                                                                                                                                                                                                                                          |
|---------------------------------------------------------|----------|--------------------------------------------------------------------------------------------------------------------------------------------------------------------------------------------------------------------------------------------------------------------------------------------------------------------------------------------------------------------------------------------------------------------------------------------------------------------------------------------------------------------------------------------------------------------------------|
| ncRNA metabolic process (GO:0034660; GO0034470)         | 2.15E-12 | ZCCHC11;VARS;TSEN15;WDR4;MTO1;RRP8;TSEN54;RRP9;FBL;NARS2;DUS4L;UTP14A;UTP15;PRMT5;NCBP1;TYW5;DIMT1;DIS3;NSUN5;TYW3;PUS1;ELAC2;NSUN2;DDX56;ELAC1;TRPT1;IMP4;TFB2M;UTP11L;QTRTD1;QRSL1;FTSJ1;UTP18;GTPBP3;WDR77;FTSJ3;QTRT1;CTU2;DALRD3;SARS2;CIRH1A;PPA2;RRNAD1;DKC1;PAPD5;TUT1;GEMIN5;EEF1E1;DUS3L;TRUB1;NOLC1;LAGE3;RBFA;NOL6;EXOSC7;EMG1;PDCD11;WBSCR22;UTP20;SMN1;RPP14;PUSL1;TRDMT1;EXOSC1;DCAF13;FDXACB1;SMAD2;NOP56;NOP14;UTP6;NOP58;SMAD3;GATC;TRMT1;RRP1B;PA2G4;PUS7L;HARS2;TARBP2;WARS2;BOP1;LAS1L;AGO2;TRMT13;INTS6;FARSA;NOP10                                      |
| chromatin modification (GO:0016568)                     | 1.52E-07 | KDM5A;SUV420H2;CRTC2;KDM5C;SETD8;HDAC10;LDB1;PHF1;SETD7;HDAC11;JADE1;DPY30;ARID4A;PRDM2;JADE3;CHD4;CHD3;BMI1;RRP8;MECP2;ELK4;ING5;FBL;ING2;ING3;RPS6KA5;EPC1;HMG20A;EPC2;JAK2;JARID2;HMGN3;CSR2BP;TSPYL2;NCOA1;PRMT6;PRMT5;SMARCC1;KDM2A;PRMT7;USP49;KDM2B;PRMT2;RING1;DTX3L;PRMT3;DNMT3A;TET2;MSL3;TET1;PRKCA;CHD1L;ARID1B;TERF2;DDB2;JMJD6;DNAJC2;KAT2B;WDR82;KAT6B;CLOCK;KDM7A;HDAC5;ENY2;PRKAA2;L3MBTL2;MEAF6;LEF1;DOT1L;HDAC6;TAF5L;BAG6;HLCS;LEO1;SMYD2;WBSCR22;PCGF1;BRD9;APBB1;DMAP1;CBX2;SS18L1;PCGF2;ELP4;TRD3;HOPX;ASXL1;TADA2A;KANSL2;CDK2;TADA1;TCF3;OGT          |
| rRNA processing (GO:0006364)                            | 1.80E-07 | NOLC1;RBFA;RRP8;RRP9;NOL6;EXOSC7;FBL;EMG1;PDCD11;WBSCR22;UTP20;UTP14A;EXOSC1;DCAF13;NOP56;UTP15;NOP14;UTP6;NOP58;DIMT1;DIS3;NSUN5;DDX56;IMP4;TFB2M;PA2G4;UTP11L;RRP1B;UTP18;FTSJ3;BOP1;CIRH1A;LAS1L;RRNAD1;DKC1;PAPD5;NOP10                                                                                                                                                                                                                                                                                                                                                    |
| RNA modification (GO:0009451)                           | 1.51E-06 | TRUB1;RNMT;WDR4;TRMT2A;MTO1;EMG1;PUSL1;DUS4L;TRDMT1;WTAP;TYW5;DIMT1;PUS1;NSUN2;METTL3;TRMT1;TFB2M;QTRTD1;PUS7L;FTSJ1;FTSJ3;GTPBP3;QTRT1;RPU5D4;CTU2;RRNAD1;DKC1;DUS3L;NOP10                                                                                                                                                                                                                                                                                                                                                                                                    |
| tRNA metabolic process (GO:0006399)                     | 1.78E-06 | TRUB1;VARS;TSEN15;WDR4;MTO1;LAGE3;TSEN54;FBL;NARS2;PUSL1;RPP14;DUS4L;TRDMT1;FDXACB1;TYW5;PUS1;TYW3;ELAC2;NSUN2;ELAC1;GATC;TRPT1;TRMT1;QTRTD1;PUS7L;QRSL1;FTSJ1;HARS2;WARS2;GTPBP3;QTRT1;CTU2;DALRD3;SARS2;PPA2;TRMT13;EEF1E1;FARSA;DUS3L                                                                                                                                                                                                                                                                                                                                       |
| methylation (GO:0032259)                                | 1.87E-05 | N6AMT1;SUV420H2;SETD8;SETD7;WDR4;ARID4A;DPY30;PRDM2;RRP8;GCSH;MECP2;TRMT112;FBL;COMTD1;METTL13;METTL16;PRMT6;HEMK1;PRMT5;PRMT7;PRMT2;DIMT1;NSUN5;TYW3;NSUN2;PRMT3;DNMT3A;METTL3;TET2;TFB2M;FTSJ1;FTSJ3;METTL23;RRNAD1;WDR82;PICK1;GART;RNMT;SMYD5;DOT1L;TRMT2A;PRDM10;EMG1;ZFP57;SMYD2;WBSCR22;DPH5;DMAP1;TRDMT1;ATF7IP;WTAP;TRMT1;TRMT13;ZCCHC4;OGT                                                                                                                                                                                                                           |
| positive regulation of Ras GTPase activity (GO:0032320) | 4.15E-05 | USP6NL;DENND1A;DOCK7;ARHGEF10L;ARHGAP6;ARHGAP4;RCBTB2;DOCK10;DOCK11;SYDE1;SYNGAP1;RASGEF1A;AKT2;EVI5L;PLEKHG3;PLEKHG1;PLEKHG2;ARHGEF15;ARHGEF17;DENND2A;ARAP1;VAV2;BCR;ARHGAP10;TBC1D1;ARHGEF9;RASA3;RASA2;TBC1D25;DENND6B;DOCK2;SOS1;ARHGEF5;LLGL1;ARHGEF6;TBC1D19;ARHGEF25;RASAL3;KALRN;FGD1;FGD6;ERBB2;NCKAP1L;EPS8L2;WNT4;FARP1;DENND4B;DENND4A;RAB3IP;SGSM1;ARHGAP33;TBCK;SGSM2;PLXNB1;RGL3;AGRN;RGL1                                                                                                                                                                     |
| protein acetylation (GO:0006473)                        | 4.46E-05 | CRTC2;LDB1;MEAF6;LEF1;JADE1;JADE3;TAF5L;BAG6;MECP2;ING5;ING3;EPC1;ASL;DMAP1;APBB1;CSR2BP;NCOA1;NAA10;PCGF2;MSL3;ELP4;KAT2B;TADA2A;KANSL2;KAT6B;TADA1;NAA16;TCF3;NAA15;CLOCK;OGT                                                                                                                                                                                                                                                                                                                                                                                                |
| positive regulation of GTPase activity (GO:0043547)     | 1.22E-04 | BCAR3;USP6NL;DOCK3;FAM13B;DENND1A;DOCK7;ARHGEF10L;ARHGAP6;RCBTB2;ARHGAP4;ARHGAP44;DOCK10;RGS4;DOCK11;RGS5;SYDE1;ARHGAP42;SYNGAP1;RASGEF1A;AKT2;ARHGDI;EVI5L;GARNL3;PSD;PLEKHG3;PLEKHG1;PLEKHG2;ARHGEF15;DIS3;ARHGEF17;DENND2A;AXIN1;ARAP1;VAV2;BCR;ARHGAP10;TBC1D1;ARHGEF9;RABEP1;RASA3;RASA2;TBC1D25;PTPLAD1;DENND6B;DOCK2;SOS1;RAPGEF6;ARHGEF5;LLGL1;ARHGEF6;TBC1D19;ARHGEF25;ARHGAP18;RASAL3;KALRN;FGD1;FGD6;CHN2;ERBB2;NCKAP1L;EPS8L2;WNT4;FARP1;STARD13;EIF2B3;DENND4B;DENND4A;RAB3IP;MYO9A;SGSM1;ARHGAP33;TBCK;ARHGAP32;SNX18;ARHGAP30;SGSM2;RGL3;PLXNB1;AGRN;SMAP2;RGL1 |
| positive regulation of Rho GTPase activity (GO:0032321) | 2.43E-04 | ARHGEF25;DOCK7;ARHGEF10L;ARHGAP6;KALRN;FGD1;ARHGAP4;DOCK10;DOCK11;SYDE1;FGD6;ERBB2;EPS8L2;NCKAP1L;WNT4;PLEKHG3;FARP1;PLEKHG1;PLEKHG2;ARHGEF15;ARHGEF17;ARAP1;VAV2;BCR;ARHGAP33;ARHGAP10;ARHGEF9;PLXNB1;DOCK2;SOS1;AGRN;ARHGEF5;ARHGEF6                                                                                                                                                                                                                                                                                                                                         |

**Supplementary Table 11:** Primer sequences for real-time PCR

| <b>Gene</b>     | <b>Forward</b>                | <b>Reverse</b>                |
|-----------------|-------------------------------|-------------------------------|
| <i>Gapdh</i>    | 5'-GCCATCAACGACCCCTTCAT-3'    | 5'-ATGATGACCCGTTTGGCTCC-3'    |
| <i>Nphs1</i>    | 5'-GTGCCCTGAAGGACCCTACT-3'    | 5'-CCTGTGGATCCCTTTGACAT-3'    |
| <i>Nphs2</i>    | 5'-CTTGGCACATCGATCCCTCA-3'    | 5'-CGCACTTTGGCCTGTCTTTG-3'    |
| <i>Synpo</i>    | 5'-CTTTGGGGAAGAGGCCGATTG-3'   | 5'-GTTTTCGGTGAAGCTTGTGC-3'    |
| <i>Wt1</i>      | 5'-GAGAGCCAGCCTACCATCC-3'     | 5'-GGGTCCTCGTGTGTTGAAGAA-3'   |
| <i>Pecam-1</i>  | 5'-AGCCTAGTGTGGAAGCCAAC-3'    | 5'-AGCCTTCCGTTCTCTTGGTG-3'    |
| <i>Cdh5</i>     | 5'-GTCGATGCTAACACAGGGAATG-3'  | 5'-AATACCTGGTGCGAAAACACA-3'   |
| <i>Pax8</i>     | 5'-ATGCCTCACAACCTCGATCAGA-3'  | 5'-ACAATGCGTTGACGTACAACCTT-3' |
| <i>Angptl4</i>  | 5'-CATTGGCTTGACTCCCAACG-3'    | 5'-AAGTCCACAGAGCCGTTCCAG-3'   |
| <i>Ecm1</i>     | 5'-ACCAGTGACCAGTTCTTGCC-3'    | 5'-CATGGAGGTGCTGGAAGAGG-3'    |
| <i>Serpine1</i> | 5'-TTCAGCCCTTGCTTGCCTC-3'     | 5'-ACACTTTTACTCCGAAGTCGGT-3'  |
| <i>Itgb3</i>    | 5'-CCACACGAGGCGTGAAGTC-3'     | 5'-CTTCAGGTTACATCGGGGTGA-3'   |
| <i>Ramp2</i>    | 5'-GCAGGCATTACAGCGACCT-3'     | 5'-GGAGCAGTTCGCAAAGTGTATC-3'  |
| <i>Adm</i>      | 5'-CACCTGATGTTATTGGGTTCA-3'   | 5'-TTAGCGCCCACTTATTCCACT-3'   |
| <i>Epas1</i>    | 5'-CTGAGGAAGGAGAAATCCCGT-3'   | 5'-TGTGTCCGAAGGAAGCTGATG-3'   |
| <i>Cib1</i>     | 5'-CCGAGTACCAGGCTAACCCCTT-3'  | 5'-TCCCGTGAGGCAATTCACAAG-3'   |
| <i>Gpr56</i>    | 5'-CTGCGGCAGATGGTCTACTTC-3'   | 5'-ATAGTGGAGGGTGTCTGTGTTG-3'  |
| <i>Kdm6a</i>    | 5'-AAGGCTGTTCGCTGCTACG-3'     | 5'-GGATCGACATAAAGCACCTCC-3'   |
| <i>Prkaa2</i>   | 5'-CAGGCCATAAAGTGGCAGTTA-3'   | 5'-AAAAGTCTGTGCGGAGTGCTGA-3'  |
| <i>Met</i>      | 5'-GTGAACATGAAGTATCAGCTCCC-3' | 5'-TGTAGTTTGTGGCTCCGAGAT-3'   |
| <i>Ddb2</i>     | 5'-AAATGCCAGAAACCCAGAAG-3'    | 5'-GTCCTGCTAGAAACGGGACC-3'    |
| <i>Zfp57</i>    | 5'-ACACCAGTCAGTTATGAGGACG-3'  | 5'-TCCACCTTTGAATACCCCTGT-3'   |
